# Supplementary material
Source: HighWire-hosted journal article supplement (https://www.rcpjournals.org/highwire/filestream/13073/field_highwire_adjunct_files/0/Letters_to_the_editor_Pierce_supplementary_material_S1.pdf)

**Table S1. The components of the carbon footprint of the care pathway and their calculation**

| Care Pathway Component                                          | Carbon Footprint Estimation                                                                                                        |
|-----------------------------------------------------------------|------------------------------------------------------------------------------------------------------------------------------------|
| 1. kgCO <sub>2</sub> e of Patient Travel                        | Number of miles travelled x 0.24250 kgCO <sub>2</sub> e/mile <sup>1</sup>                                                          |
| 2. kgCO <sub>2</sub> e of Inpatient Bed Day                     | (Number of hours as an inpatient x 7.29 kWh/bed/hour <sup>2</sup> ) x 0.39108 kgCO <sub>2</sub> e/kWh <sup>3</sup>                 |
| 3. kgCO <sub>2</sub> e of GP Consultations                      | Number of GP consultations x 1.14kgCO <sub>2</sub> e/consultation <sup>4</sup>                                                     |
| 4. kgCO <sub>2</sub> e of Blood Tests                           | (Number of coagulation studies + number of renal profiles) x (£3.20/blood test x 0.42 kgCO <sub>2</sub> e/£ <sup>5</sup> )         |
| 5. kgCO <sub>2</sub> e of Procedural Pharmaceutical Procurement | Total price of pharmaceuticals used during the procedure in £s <sup>6</sup> x 0.56 kgCO <sub>2</sub> e/£ <sup>5</sup>              |
| 6. kgCO <sub>2</sub> e of Procedural Equipment Procurement      | Total price of medical equipment used during the procedure in £s x 0.42 kgCO <sub>2</sub> e/£ <sup>5</sup>                         |
| 7. kgCO <sub>2</sub> e of Oxygen Procurement                    | (Total volume of oxygen used during procedure in litres x £0.00236/litre <sup>53</sup> ) x 0.56 kgCO <sub>2</sub> e/£ <sup>5</sup> |
| 8. kgCO <sub>2</sub> e of Waste Incineration                    | Total weight of procedural waste in grams x 0.0018 kgCO <sub>2</sub> e/g <sup>6</sup>                                              |
| 9. kgCO <sub>2</sub> e of Water Usage (Bed Day)                 | Number of hours as an in-patient x 0.00346 kgCO <sub>2</sub> e/hour <sup>2</sup>                                                   |
| 10. kgCO <sub>2</sub> e of Water Usage (Procedure)              | Length of the procedure in minutes x 0.000803 kgCO <sub>2</sub> e/minute <sup>7</sup>                                              |
| 11. kgCO <sub>2</sub> e of Procedure (Average)                  | (6+7+8+9+10+11+12 for each procedure) ÷ number of procedures                                                                       |
| 12. kgCO <sub>2</sub> e of Care Pathway                         | 1+2+3+4+5+11                                                                                                                       |

- [https://www.sduhealth.org.uk/documents/publications/2014/GHG\\_Prescription\\_Feb\\_2014.pdf](https://www.sduhealth.org.uk/documents/publications/2014/GHG_Prescription_Feb_2014.pdf) (Accessed 19th November 2020)
- Penny T, Collins M, Whiting A, et al. Inpatient Bed Day Module. *Care Pathways: Guidance for Appraising Sustainability* 2015  
[https://www.sduhealth.org.uk/documents/publications/2015/CSPM%20Care%20Pathways%20Guidance/4. Sustainable Care Pathways Guidance - Inpatient Bed Day Module - Oct 2015.pdf](https://www.sduhealth.org.uk/documents/publications/2015/CSPM%20Care%20Pathways%20Guidance/4._Sustainable_Care_Pathways_Guidance_-_Inpatient_Bed_Day_Module_-_Oct_2015.pdf)
- Hill N, Bramwell R, Harris B. 2017 Government GHG Conversion Factors for Company Reporting: Department for Business Energy and Strategy, 2017:138. Available at [https://assets.publishing.service.gov.uk/government/uploads/system/uploads/attachment\\_data/file/650244/2017\\_methodology\\_paper\\_FINAL\\_MASTER.pdf](https://assets.publishing.service.gov.uk/government/uploads/system/uploads/attachment_data/file/650244/2017_methodology_paper_FINAL_MASTER.pdf) (Accessed 22/01/21)
- Penny T, Collins M, Whiting A, et al. GP Consultation Module. *Care Pathways: Guidance on Appraising Sustainability*, 2015  
[https://www.sduhealth.org.uk/documents/publications/2015/CSPM%20Care%20Pathways%20Guidance/1. Sustainable Care Pathways Guidance - GP Consultation Module - Oct 2015.pdf](https://www.sduhealth.org.uk/documents/publications/2015/CSPM%20Care%20Pathways%20Guidance/1._Sustainable_Care_Pathways_Guidance_-_GP_Consultation_Module_-_Oct_2015.pdf) (Accessed 19/11/20)
- Sustainable Development Unit. NHS England Carbon Emissions Carbon Footprinting Report, 2008. [http://www.sd-commission.org.uk/data/files/publications/NHS\\_Carbon\\_Emissions\\_modelling1.pdf](http://www.sd-commission.org.uk/data/files/publications/NHS_Carbon_Emissions_modelling1.pdf) Accessed (16/03/21)

6. Connor A, Lillywhite R, Cooke MW. The carbon footprint of a renal service in the United Kingdom. *QJM: Monthly Journal Of The Association Of Physicians* 2010;103(12):965-75.6

7. Penny T, Collins M, Whiting A, et al. Surgical Procedure Module. *Care Pathways: Guidance on Appraising Sustainability* 2015.

<https://www.sduhealth.org.uk/documents/publications/2015/CSPM%20Care%20Pathways%20Guidance/5. Sustainable Care Pathways Guidance - Surgical Procedure Module - Oct 2015.pdf>

(Accessed 19/11/20)

**Table S2. Original data and its conversion to allow for carbon footprint estimation**

| <b>Original dataset</b>                                                        | <b>Converted dataset</b>                                                           |
|--------------------------------------------------------------------------------|------------------------------------------------------------------------------------|
| Home postcode, GP postcode, and UHS postcode.                                  | Distance from home to GP (miles), and from home to UHS (miles), as the crow flies. |
| Distances between destinations, and number of UHS, GP and other clinic visits. | Total miles travelled by the patient during the care pathway, as the crow flies.   |
| Time admitted to UHS for cardioversion, and time discharged post-procedure.    | Total time spent at UHS as an in-patient (to the nearest hour).                    |

**Fig S1. Flow diagram outlining the direct current cardioversion care pathway.**

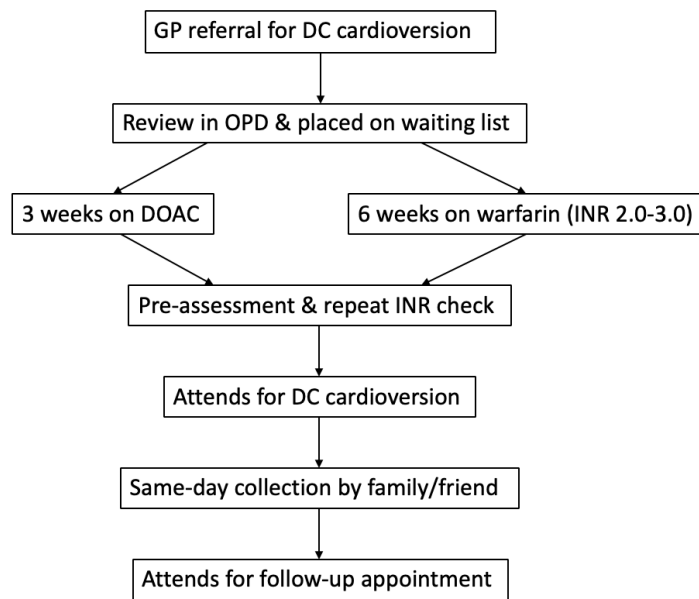

**Fig S2. Patient flow.**

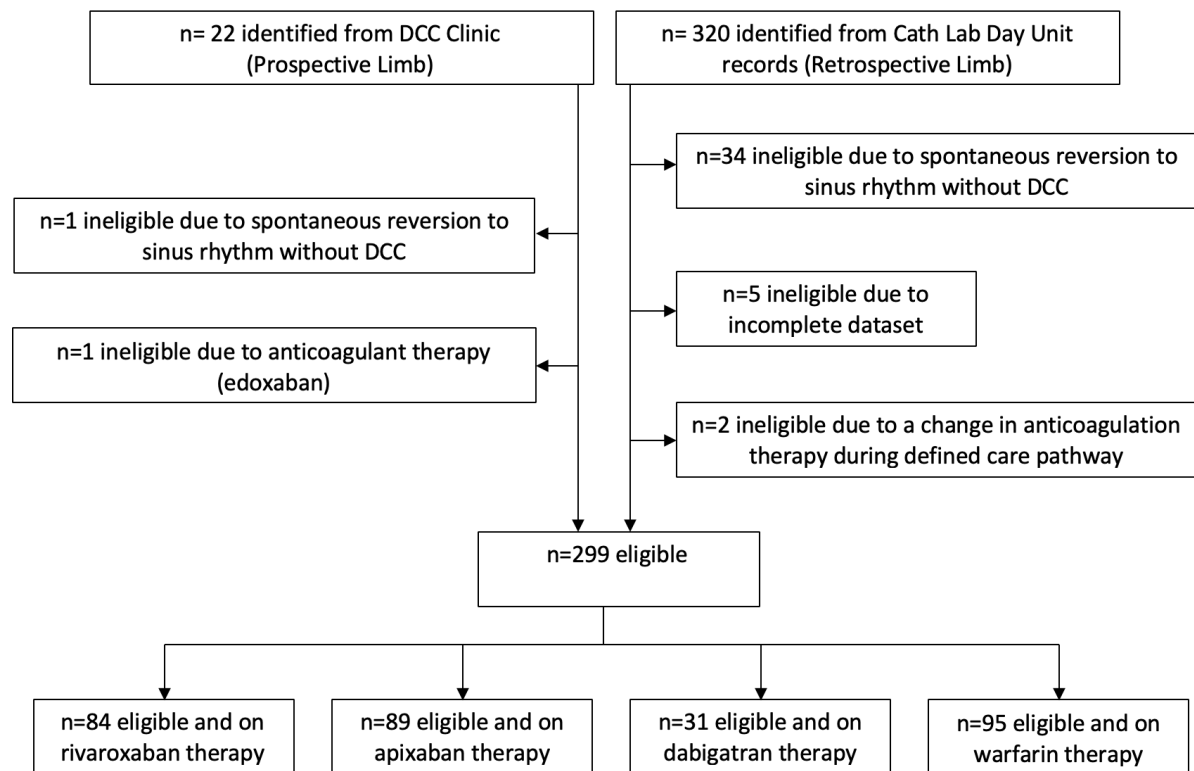

Supplement: Letters_to_the_editor_Pierce_supplementary_material_S1.pdf [file Letters_to_the_editor_Pierce_supplementary_material_S1.pdf]
